# Supplementary material for: Fischer–Tropsch synthesis: effect of Cu, Mn and Zn addition on activity and product selectivity of cobalt ferrite
Source: Royal Society of Chemistry journal article supplement (doi:10.1039/c6ra10150j), 2016-01-01
Supplement: c6ra10150j1.pdf [file c6ra10150j1.pdf]

## Supporting Information

Table S1 Mössbauer results of  $\text{Co}_{0.7}\text{M}_{0.3}\text{Fe}_{2.0}$  catalysts (M = Cu or Mn or Zn) after activation in CO at 270°C and 170 psig measured at 20 K

| Sample                                          | Param.    | Co-Fe | $\chi\text{-Fe}_5\text{C}_2$ |       |       |       | $\epsilon'\text{-Fe}_{2.2}\text{C}$ | $\text{Fe}_3\text{O}_4$ |    |       | Fe distribution (%)          |                                     |          |  |
|-------------------------------------------------|-----------|-------|------------------------------|-------|-------|-------|-------------------------------------|-------------------------|----|-------|------------------------------|-------------------------------------|----------|--|
|                                                 |           | S1    | S2                           | S3    | S4    | S5    | S7                                  | S8                      | S9 | Co-Fe | $\chi\text{-Fe}_5\text{C}_2$ | $\epsilon'\text{-Fe}_{2.2}\text{C}$ | Fe-Oxide |  |
| $\text{Co}_{0.7}\text{Cu}_{0.3}\text{Fe}_{2.0}$ | H (kG)    | 353   | 250                          | 211   | 122   | 178   | 499                                 | 480                     | -  | 24    | 53                           | 15                                  | 8        |  |
|                                                 | IS (mm/s) | 0.01  | 0.27                         | 0.25  | 0.12  | 0.23  | 0.49                                | 0.2                     | -  |       |                              |                                     |          |  |
|                                                 | QS (mm/s) | 0.01  | 0.07                         | -0.14 | -0.07 | 0.05  | 0.3                                 | -0.06                   | -  |       |                              |                                     |          |  |
|                                                 | Fe%       | 24    | 20                           | 18    | 15    | 15    | 4                                   | 4                       | -  |       |                              |                                     |          |  |
| $\text{Co}_{0.7}\text{Mn}_{0.3}\text{Fe}_{2.0}$ | H (kG)    | 354   | 248                          | 218   | 126   | 182   | 503                                 | -                       | -  | 25    | 46                           | 15                                  | 14       |  |
|                                                 | IS (mm/s) | 0.04  | 0.27                         | 0.31  | 0.17  | 0.23  | 0.3                                 | -                       | -  |       |                              |                                     |          |  |
|                                                 | QS (mm/s) | 0     | 0.1                          | -0.06 | -0.06 | 0.06  | -0.31                               | -                       | -  |       |                              |                                     |          |  |
|                                                 | Fe%       | 25    | 18                           | 14    | 14    | 15    | 14                                  | -                       | -  |       |                              |                                     |          |  |
| $\text{Co}_{0.7}\text{Zn}_{0.3}\text{Fe}_{2.0}$ | H (kG)    | 349   | 255                          | 216   | 126   | 184   | 515                                 | 477                     | -  | 24    | 22                           | 8                                   | 46       |  |
|                                                 | IS (mm/s) | 0.03  | 0.24                         | 0.32  | 0.24  | 0.23  | 0.35                                | 0.5                     | -  |       |                              |                                     |          |  |
|                                                 | QS (mm/s) | 0.02  | 0.03                         | -0.13 | -0.27 | -0.02 | -0.03                               | -0.35                   | -  |       |                              |                                     |          |  |
|                                                 | Fe%       | 24    | 8                            | 8     | 6     | 8     | 19                                  | 27                      | -  |       |                              |                                     |          |  |
| $\text{Co}_{1.0}\text{Fe}_{2.0}$                | H (kG)    | 344   | 249                          | 211   | 120   | 182   | -                                   | -                       | -  | 30    | 56                           | 14                                  | 0        |  |
|                                                 | IS (mm/s) | 0.02  | 0.27                         | 0.27  | 0.15  | 0.24  | -                                   | -                       | -  |       |                              |                                     |          |  |
|                                                 | QS (mm/s) | 0.02  | 0.07                         | -0.1  | -0.09 | 0.05  | -                                   | -                       | -  |       |                              |                                     |          |  |
|                                                 | Fe%       | 30    | 22                           | 16    | 18    | 14    | -                                   | -                       | -  |       |                              |                                     |          |  |

#Average uncertainties of Mössbauer parameters,  $\pm 5$  kG Hyperfine magnetic field,  $\pm 0.03$  mm/s Isomer shift,  $\pm 0.05$  mm/s Quadrupole splitting. The hyperfine field for  $\alpha\text{-Fe}$  is 330 kG.

Table S2 Mössbauer results of  $\text{Co}_{0.7}\text{M}_{0.3}\text{Fe}_{2.0}$  catalysts (M = Cu or Mn or Zn) after the FT reaction measured at 20 K

| Sample                                          | Param.    | Co-Fe | $\chi\text{-Fe}_5\text{C}_2$ |       |       |       | $\epsilon'\text{-Fe}_{2.2}\text{C}$ | $\text{Fe}_3\text{O}_4$ |       |       | Fe distribution (%)          |                                     |          |  |
|-------------------------------------------------|-----------|-------|------------------------------|-------|-------|-------|-------------------------------------|-------------------------|-------|-------|------------------------------|-------------------------------------|----------|--|
|                                                 |           | S1    | S2                           | S3    | S4    | S5    | S7                                  | S8                      | S9    | Co-Fe | $\chi\text{-Fe}_5\text{C}_2$ | $\epsilon'\text{-Fe}_{2.2}\text{C}$ | Fe-Oxide |  |
| $\text{Co}_{0.7}\text{Cu}_{0.3}\text{Fe}_{2.0}$ | H (kG)    | -     | 245                          | 220   | 117   | 203   | 513                                 | 391                     | -     | 0     | 23                           | 7                                   | 70       |  |
|                                                 | IS (mm/s) | -     | 0.29                         | 0.25  | 0.12  | 0.25  | 0.34                                | 0.22                    | -     |       |                              |                                     |          |  |
|                                                 | QS (mm/s) | -     | 0.01                         | -0.08 | 0.04  | -0.17 | -0.09                               | 0.05                    | -     |       |                              |                                     |          |  |
|                                                 | Fe%       | -     | 9                            | 9     | 5     | 7     | 51                                  | 19                      | -     |       |                              |                                     |          |  |
| $\text{Co}_{0.7}\text{Mn}_{0.3}\text{Fe}_{2.0}$ | H (kG)    | -     | 237                          | 208   | 129   | 178   | 530                                 | 513                     | 479   | 0     | 37                           | 13                                  | 50       |  |
|                                                 | IS (mm/s) | -     | 0.31                         | 0.23  | 0.19  | 0.26  | 0.43                                | 0.36                    | 0.45  |       |                              |                                     |          |  |
|                                                 | QS (mm/s) | -     | 0.02                         | -0.03 | -0.07 | 0.06  | -0.08                               | -0.09                   | -0.08 |       |                              |                                     |          |  |
|                                                 | Fe%       | -     | 15                           | 15    | 7     | 13    | 5                                   | 15                      | 24    |       |                              |                                     |          |  |
| $\text{Co}_{0.7}\text{Zn}_{0.3}\text{Fe}_{2.0}$ | H (kG)    | -     | 236                          | 211   | 124   | 184   | 513                                 | 466                     | -     | 0     | 25                           | 4                                   | 71       |  |
|                                                 | IS (mm/s) | -     | 0.28                         | 0.26  | 0.31  | 0.36  | 0.36                                | 0.41                    | -     |       |                              |                                     |          |  |
|                                                 | QS (mm/s) | -     | 0.18                         | 0.01  | 0.10  | -0.02 | -0.04                               | -0.08                   | -     |       |                              |                                     |          |  |
|                                                 | Fe%       | -     | 10                           | 10    | 5     | 4     | 41                                  | 24                      | -     |       |                              |                                     |          |  |
| $\text{Co}_{1.0}\text{Fe}_{2.0}$                | H (kG)    | -     | 243                          | 214   | 124   | 197   | 531                                 | 513                     | 487   | 0     | 42                           | 8                                   | 50       |  |
|                                                 | IS (mm/s) | -     | 0.27                         | 0.27  | 0.18  | 0.14  | 0.51                                | 0.3                     | 0.34  |       |                              |                                     |          |  |
|                                                 | QS (mm/s) | -     | 0                            | -0.14 | -0.07 | -0.1  | -0.2                                | 0                       | 0     |       |                              |                                     |          |  |
|                                                 | Fe%       | -     | 16                           | 16    | 10    | 8     | 14                                  | 18                      | 13    |       |                              |                                     |          |  |

#Average uncertainties of Mössbauer parameters ,  $\pm 5$  kG Hyperfine magnetic field,  $\pm 0.03$  mm/s Isomer shift,  $\pm 0.05$  mm/s Quadrupole splitting. The hyperfine field for  $\alpha\text{-Fe}$  is 330 kG.

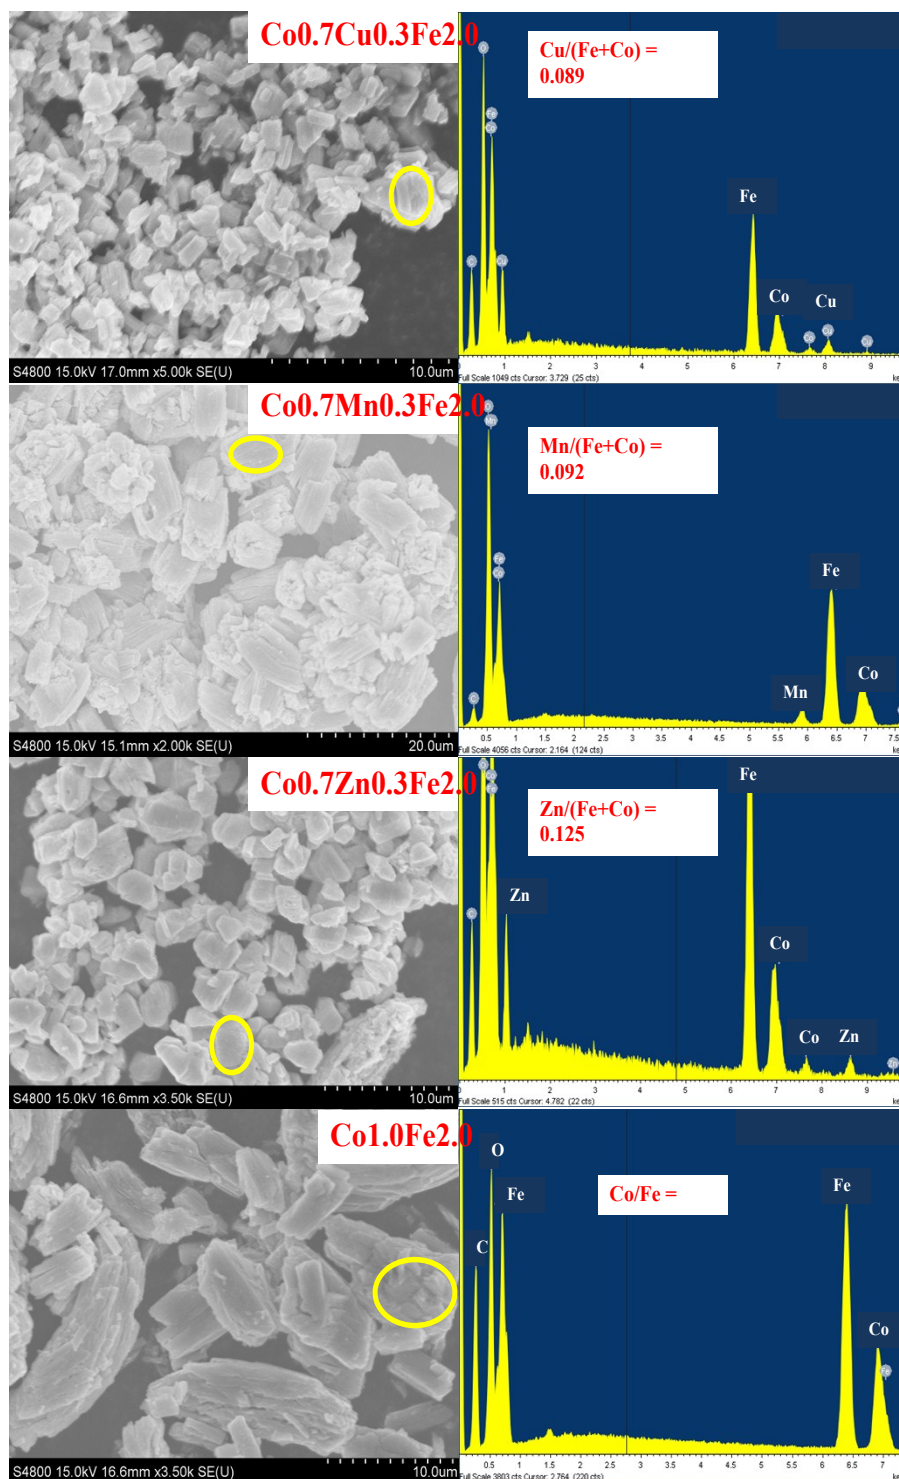

Figure S1 SEM images (left) of  $\text{Co}_{0.7}\text{M}_{0.3}\text{Fe}_{2.0}$  samples (M = Cu or Mn or Zn) after decomposition of the respective metal oxalates in  $\text{N}_2$  at  $400^\circ\text{C}$  and the corresponding EDX graph (right) obtained from the circled region.

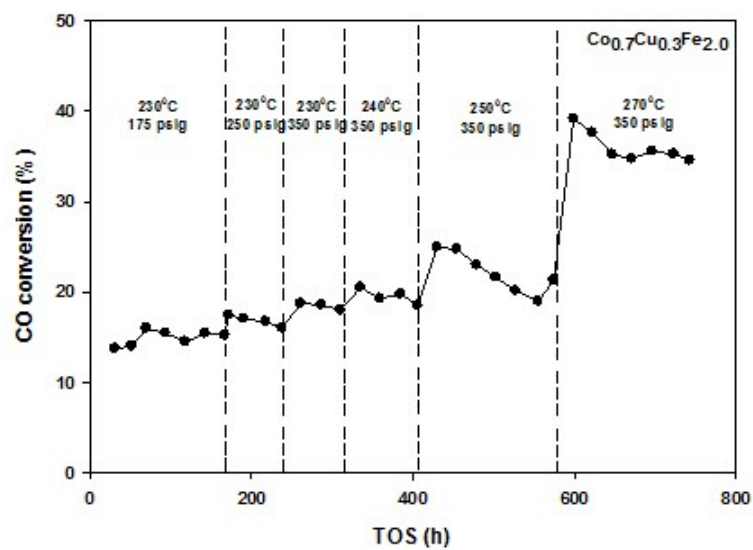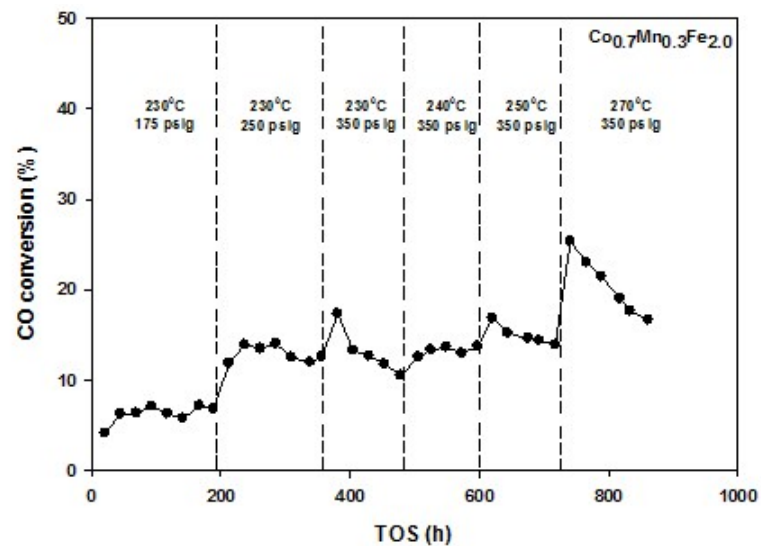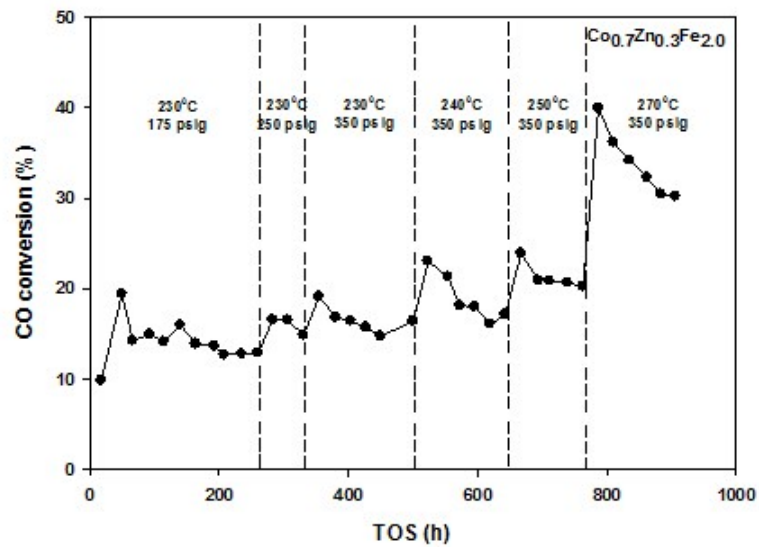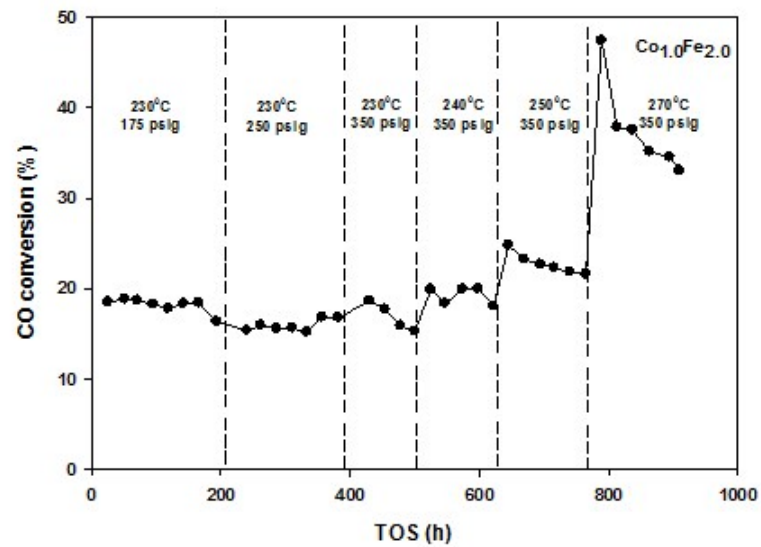

Figure S2 The effect of operating conditions on the conversion of CO for various cobalt ferrites after carburization.

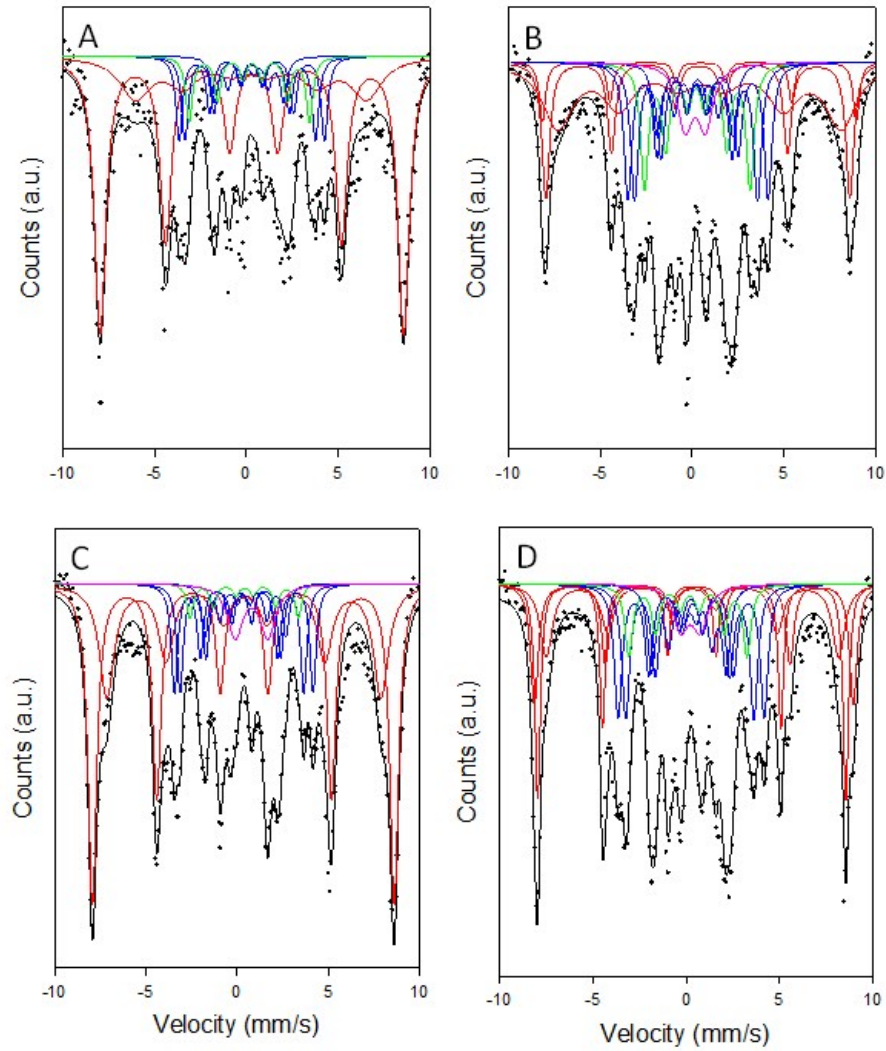

Figure S3 Mössbauer spectrum of  $\text{Co}_{0.7}\text{M}_{0.3}\text{Fe}_{2.0}$  catalysts ( $M = \text{Cu}$  or  $\text{Mn}$  or  $\text{Zn}$ ) after FT synthesis performed at 20 K; (A)  $\text{Co}_{0.7}\text{Cu}_{0.3}\text{Fe}_{2.0}$ , (B)  $\text{Co}_{0.7}\text{Mn}_{0.3}\text{Fe}_{2.0}$ , (C)  $\text{Co}_{0.7}\text{Zn}_{0.3}\text{Fe}_{2.0}$ , (D)  $\text{Co}_{1.0}\text{Fe}_{2.0}$ . The fitted curves are shown in solid lines: black, total spectra; red, oxide; blue,  $\gamma\text{-Fe}_5\text{C}_2$ ; green,  $\epsilon'\text{-Fe}_{2.2}\text{C}$ , dark blue, FeCo bimetallic.

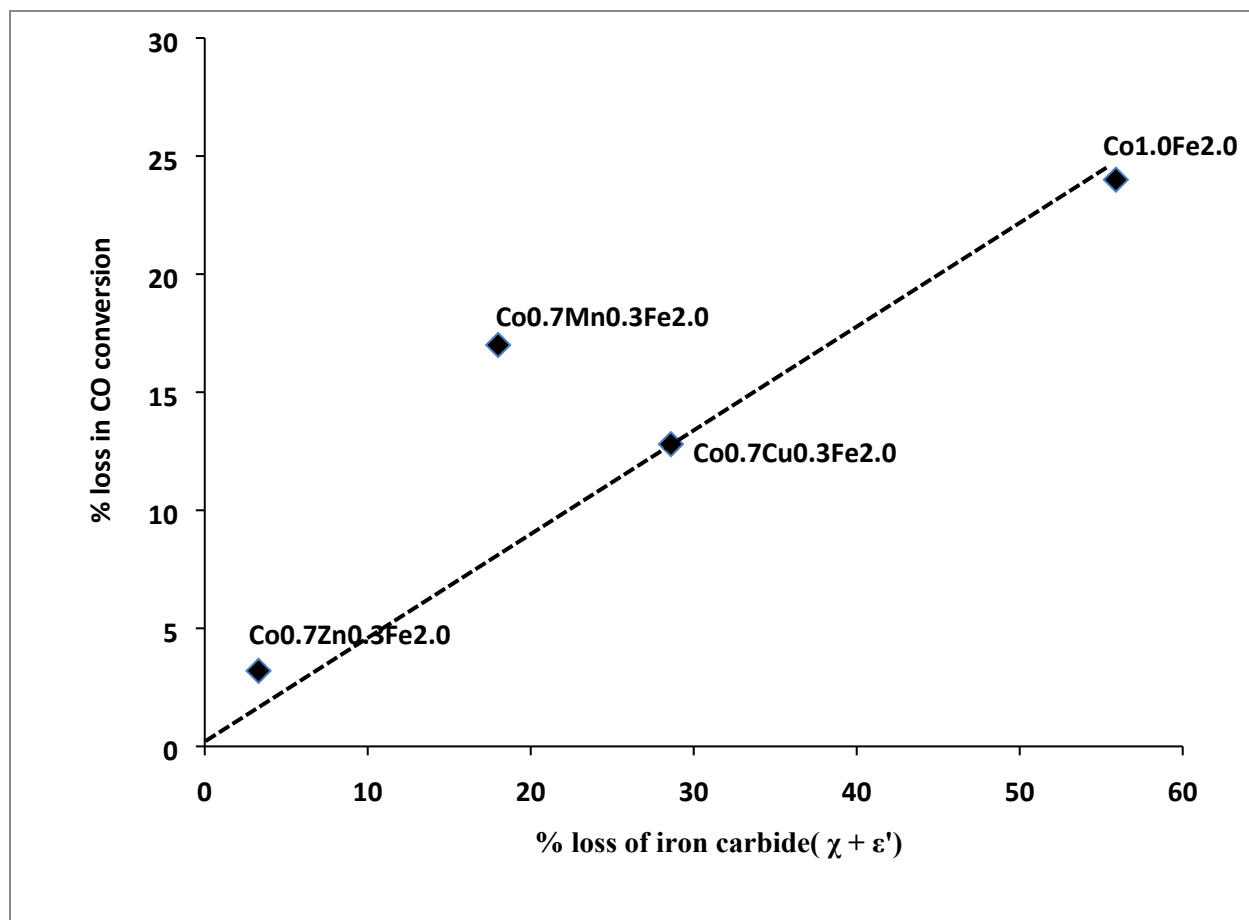

Figure S4 A comparison between the iron carbide content and the conversion of CO for various  $\text{Co}_{0.7}\text{M}_{0.3}\text{Fe}_{2.0}$  catalysts (M = Cu or Mn or Zn).
